# Supplementary material
Source: publisher figshare collection journal article supplement (https://frontiersin.figshare.com/ndownloader/files/23920691)
Supplement: Supplementary file [file 23920691]

## Supplementary Material

# Capsule Protects *Acinetobacter baumannii* From Inter-Bacterial Competition Mediated by CdiA Toxin

Renatas Krasauskas<sup>1\*</sup>, Jūratė Skerniškytė<sup>1</sup>, Julius Martinkus<sup>1</sup>, Julija Armalytė<sup>1</sup>, Edita Sužiedėlienė<sup>1</sup>

<sup>1</sup>Institute of Biosciences, Life Sciences Center, Vilnius University, Vilnius, Lithuania

\* Correspondence:

Renatas Krasauskas

[renatas.krasauskas@gf.vu.lt](mailto:renatas.krasauskas@gf.vu.lt)

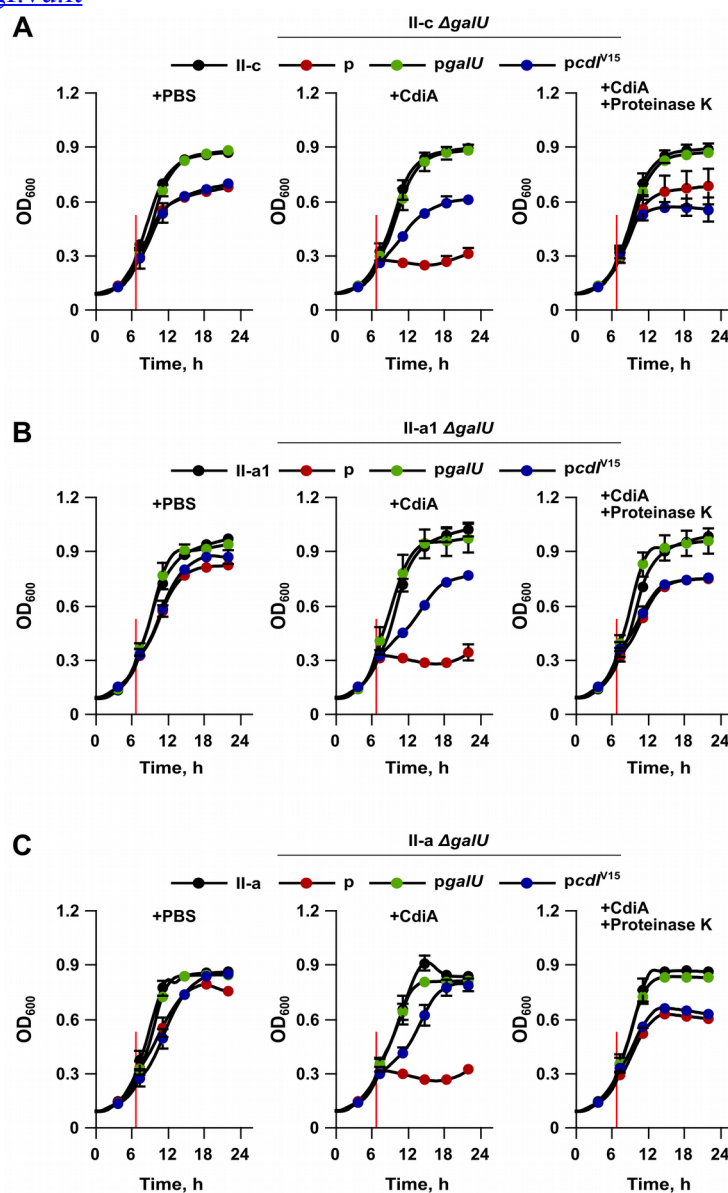

### Supplementary Material

**Supplementary Figure S3. (A-C)** Growth inhibition assays of *A. baumannii* clinical strains II-c (**A**), II-a1 (**B**), II-a (**C**) their *galU* mutants, and *galU* mutants complemented with either wild-type *galU* gene or immunity gene *cdiI*<sup>V15</sup> from the *A. baumannii* V15 strain. Red vertical lines denote the time when 10  $\mu$ L of either PBS, 50 ng of purified CdiA, or 50 ng of purified CdiA pre-incubated with Proteinase K for 30 min were added. Values were calculated from three independent experiments each with two technical replicates. Error bars represent standard deviation.
